# Supplementary material for: Insights into Dodecenes Produced from Olefin Oligomerization Based on Two-Dimensional Gas Chromatography–Photoionization–Time of Flight Mass Spectrometry and Multivariate Statistics
Source: PubMed Central journal article supplement — ACS Omega. 2021 Nov 10;6(46):30971–82. doi: 10.1021/acsomega.1c03328 (PMC8613810; doi:10.1021/acsomega.1c03328), 2021-11-10
Supplement: ao1c03328_si_001.pdf [file ao1c03328_si_001.pdf]

## Support Information

### **Insights into Dodecenes Produced from Olefin Oligomerization Based on Two-Dimensional Gas Chromatography-Photoionization-Time of Flight Mass Spectrometry and Multivariate Statistics**

Yun Zou<sup>a\*</sup>, Pierre-Hugues Stefanuto<sup>a</sup>, Mariarosa Maimone<sup>b</sup>, Marcel Janssen<sup>b</sup>, Jean-François Focant<sup>a</sup>

<sup>a</sup> Organic and Biological Analytical Chemistry Group, MolSys Research Unit, University of Liège, Allée du 6 aout, B6c, B-4000 Liège (Sart Tilman), Belgium

<sup>b</sup> ExxonMobil Chemical Europe Inc., Hermeslaan 2, 1831 Machelen, Belgium

\*Corresponding Author:

Yun Zou

Address: Organic and biological analytical chemistry group, MolSys Research Unit, University of Liège, Allée du 6 aout, B6c, B-4000 Liège (Sart Tilman), Belgium

Email: [yun.zou.titech@gmail.com](mailto:yun.zou.titech@gmail.com), [yun\\_zou\\_titech@163.com](mailto:yun_zou_titech@163.com)

Phone: +32 4 3663430

Fax: +32 4 3664387

### Contents

- S-1. HCA of catalysts
- S-2. The important features from olefin congeners to differentiate catalysts
- S-3. Potential indicators of catalysts
- S-4. The important features from olefin congeners to differentiate feedstocks
- S-5. The important features from dodecene subgroups to differentiate feedstocks
- S-6. The clustering of the feedstocks of the 17 dodecene products
- S-7. Potential indicators of C<sub>4</sub> and C<sub>3</sub>+C<sub>4</sub> feedstocks
- S-8. The sample information
- S-9. Details of analytical condition
- S-10. Chromatogram of dodecene product

## S-1. HCA of catalysts

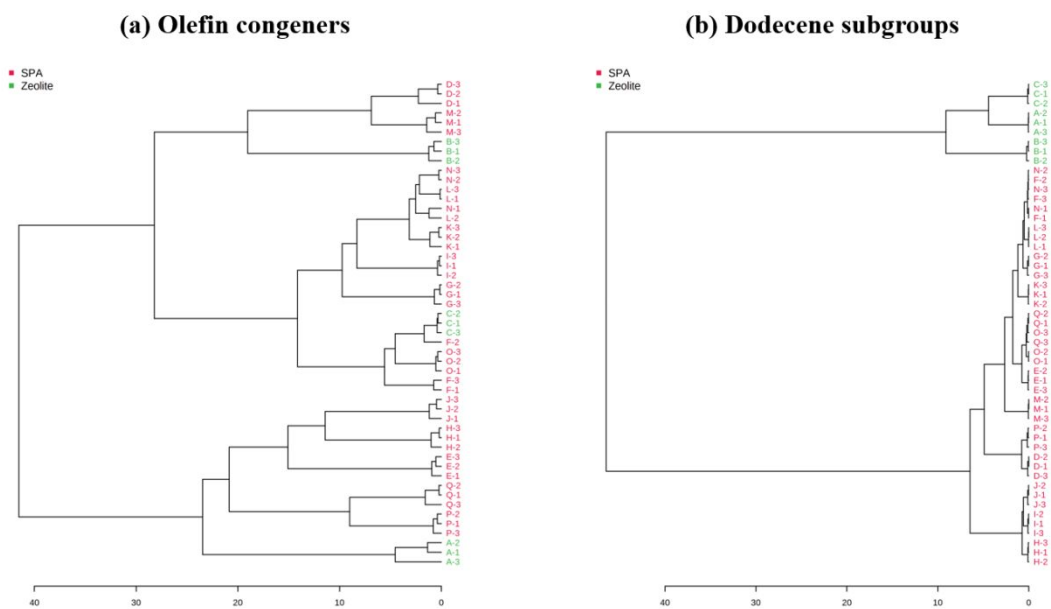

Figure S1. HCA using the data set of (a) olefin congeners and (b) dodecene subgroups of 17 dodecene products to differentiate catalysts.

## S-2. The important features from olefin congeners to differentiate catalysts

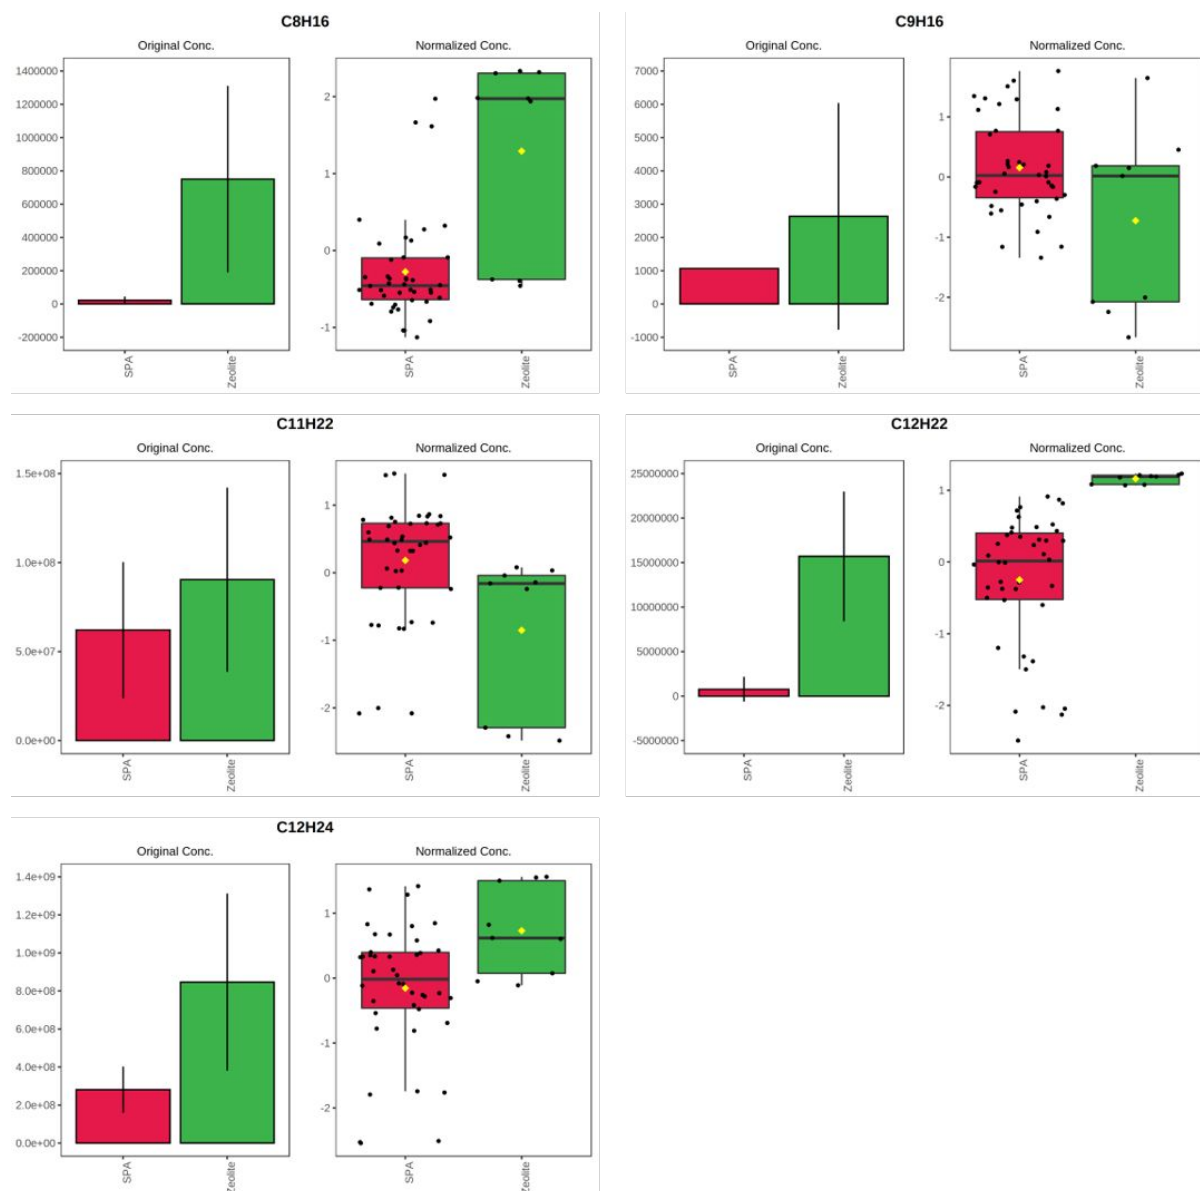

Figure S2. The important features from olefin congeners selected by T-test and PLS-DA to differentiate catalysts.

### S-3. Potential indicators of catalysts

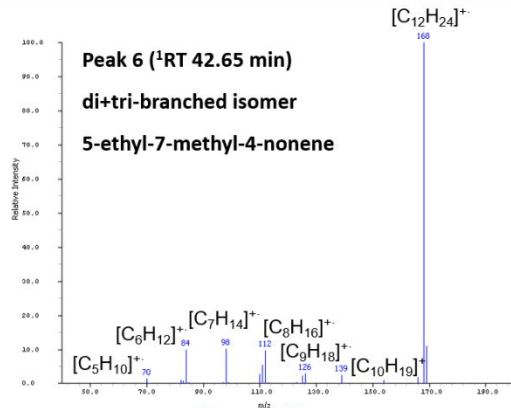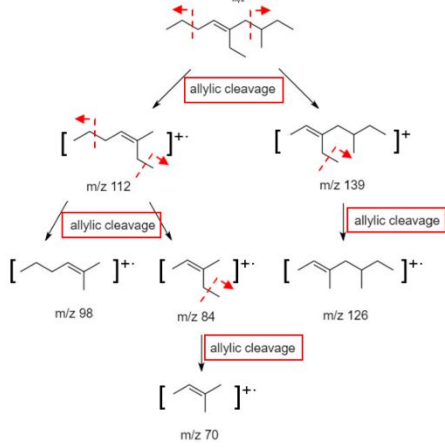

6

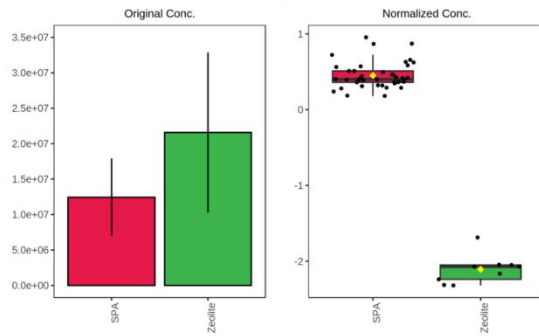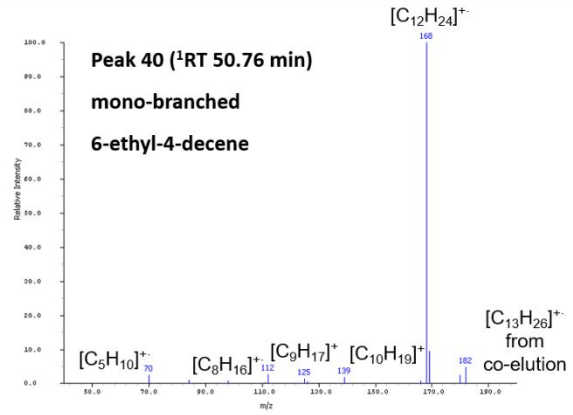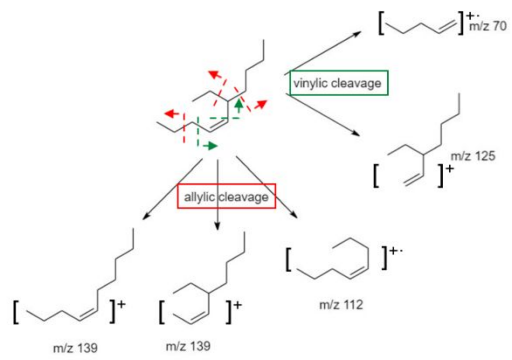

40

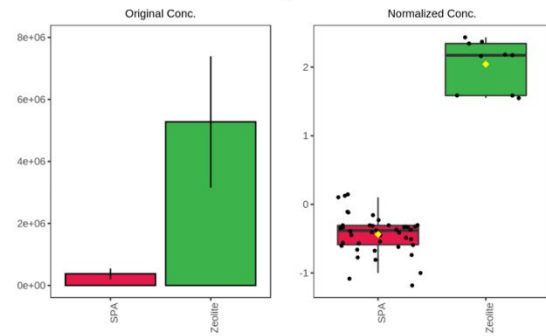

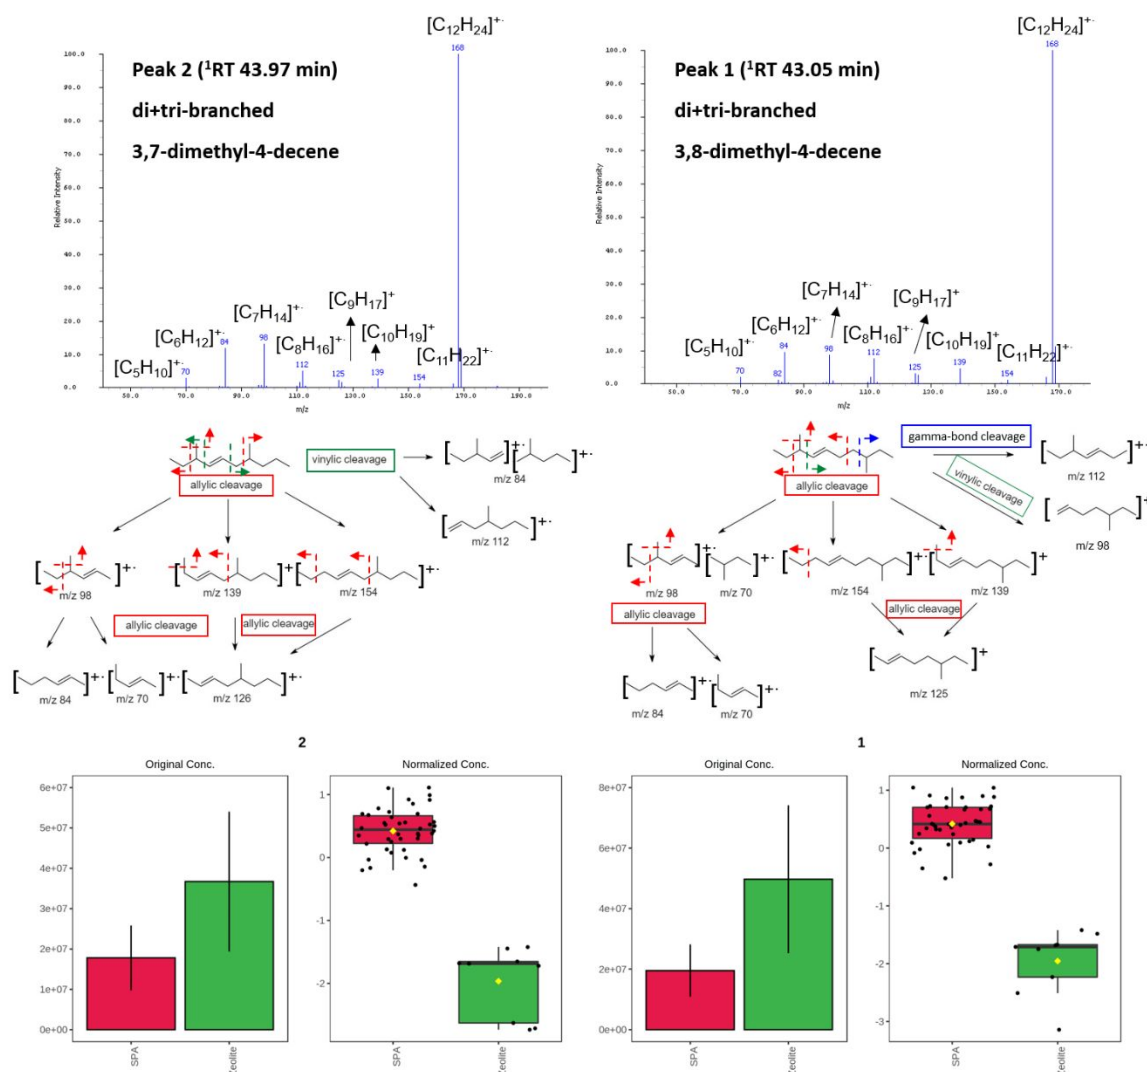

Figure S3. The important features from individual dodecene isomers selected by T-test and PLS-DA to differentiate catalysts, the PI mass spectra and predicted molecular structures. The PI mass spectra and predicted molecular structures of two compounds are presented in Fig. 6.

### S-4. The important features from olefin congeners to differentiate feedstocks

Table S1. The important features from olefin congeners selected by one-way ANOVA and Tukey's HSD.

| Olefin congener                 | <i>p</i> value | Tukey's HSD                                                                                                                                                      |
|---------------------------------|----------------|------------------------------------------------------------------------------------------------------------------------------------------------------------------|
| C <sub>11</sub> H <sub>22</sub> | 3.57E-10       | C <sub>4</sub> -C <sub>3</sub> ; C <sub>4</sub> -C <sub>3</sub> +C <sub>4</sub> ; C <sub>4</sub> -C <sub>3</sub> +C <sub>9</sub>                                 |
| C <sub>7</sub> H <sub>14</sub>  | 1.71E-06       | C <sub>4</sub> -C <sub>3</sub> ; C <sub>4</sub> -C <sub>3</sub> +C <sub>4</sub> ; C <sub>4</sub> -C <sub>3</sub> +C <sub>9</sub>                                 |
| C <sub>14</sub> H <sub>26</sub> | 6.47E-06       | C <sub>3</sub> +C <sub>4</sub> -C <sub>3</sub> ; C <sub>3</sub> +C <sub>9</sub> -C <sub>3</sub> +C <sub>4</sub> ; C <sub>4</sub> -C <sub>3</sub> +C <sub>4</sub> |
| C <sub>8</sub> H <sub>16</sub>  | 5.25E-05       | C <sub>4</sub> -C <sub>3</sub>                                                                                                                                   |

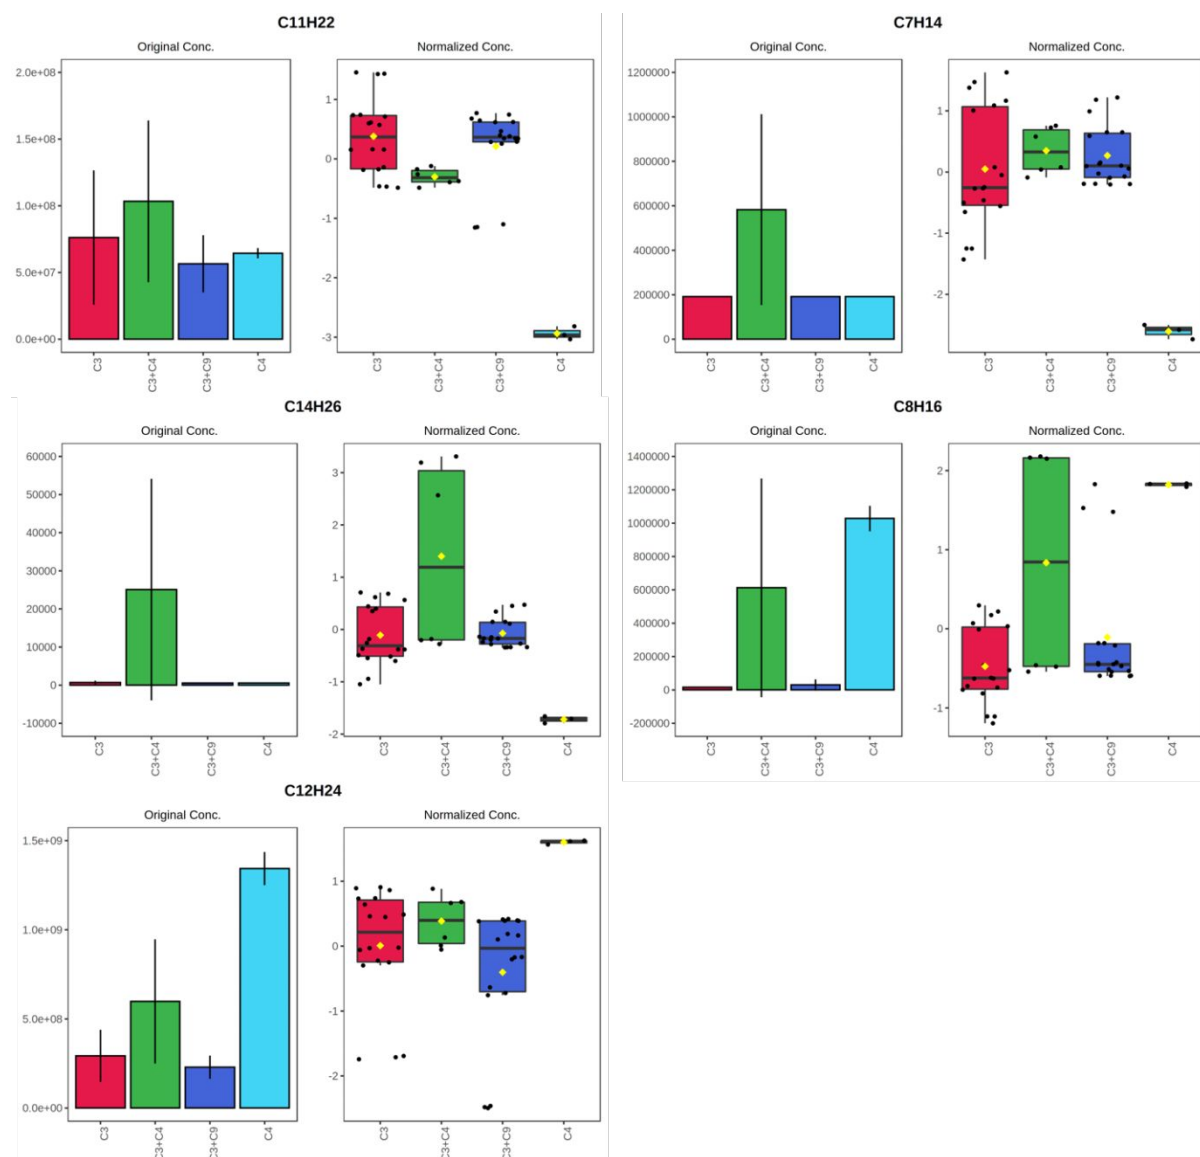

Figure S4. The comparison of the important features from olefin congeners and C<sub>12</sub>H<sub>24</sub> among 4 kinds of feedstocks.

### S-5. The important features from dodecene subgroups to differentiate feedstocks

Table S2. The important features from dodecene subgroups selected by one-way ANOVA and Tukey's HSD.

| Dodecene subgroup | <i>p</i> value | Tukey's HSD                                                                                                                                                                                                                                        |
|-------------------|----------------|----------------------------------------------------------------------------------------------------------------------------------------------------------------------------------------------------------------------------------------------------|
| Mono-branched     | 4.05E-26       | C <sub>3</sub> +C <sub>4</sub> -C <sub>3</sub> ; C <sub>4</sub> -C <sub>3</sub> ; C <sub>3</sub> +C <sub>9</sub> -C <sub>3</sub> +C <sub>4</sub> ; C <sub>4</sub> -C <sub>3</sub> +C <sub>4</sub> ; C <sub>4</sub> -C <sub>3</sub> +C <sub>9</sub> |
| Di+tri-branched   | 8.90E-19       | C <sub>3</sub> +C <sub>4</sub> -C <sub>3</sub> ; C <sub>4</sub> -C <sub>3</sub> ; C <sub>3</sub> +C <sub>9</sub> -C <sub>3</sub> +C <sub>4</sub> ; C <sub>4</sub> -C <sub>3</sub> +C <sub>4</sub> ; C <sub>4</sub> -C <sub>3</sub> +C <sub>9</sub> |
| Linear            | 1.34E-13       | C <sub>3</sub> +C <sub>4</sub> -C <sub>3</sub> ; C <sub>4</sub> -C <sub>3</sub> ; C <sub>3</sub> +C <sub>9</sub> -C <sub>3</sub> +C <sub>4</sub> ; C <sub>4</sub> -C <sub>3</sub> +C <sub>9</sub>                                                  |

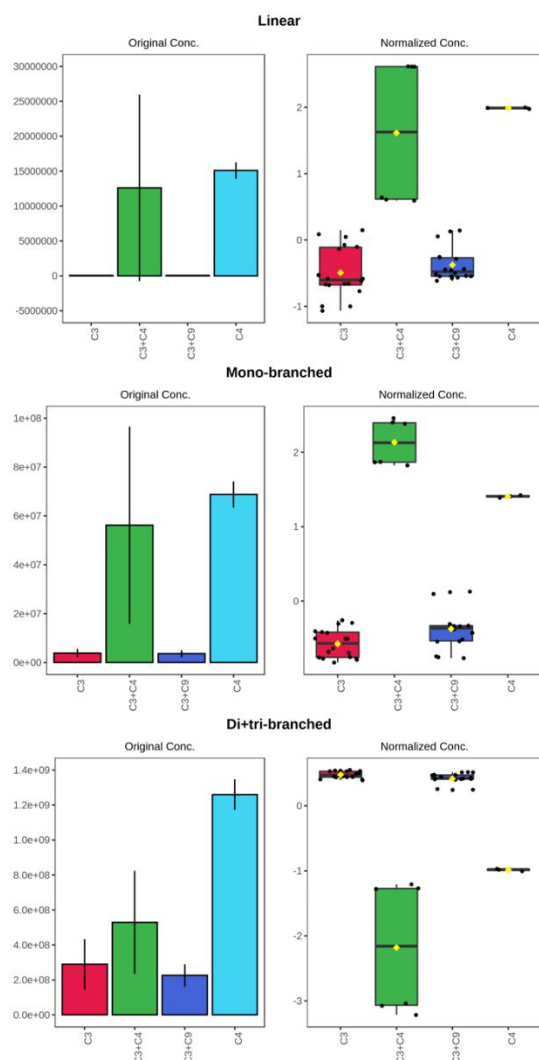

Figure S5. The comparison of the important features from dodecene subgroups among 4 kinds of feedstocks.

S-6. The clustering of the feedstocks of the 17 dodecene products

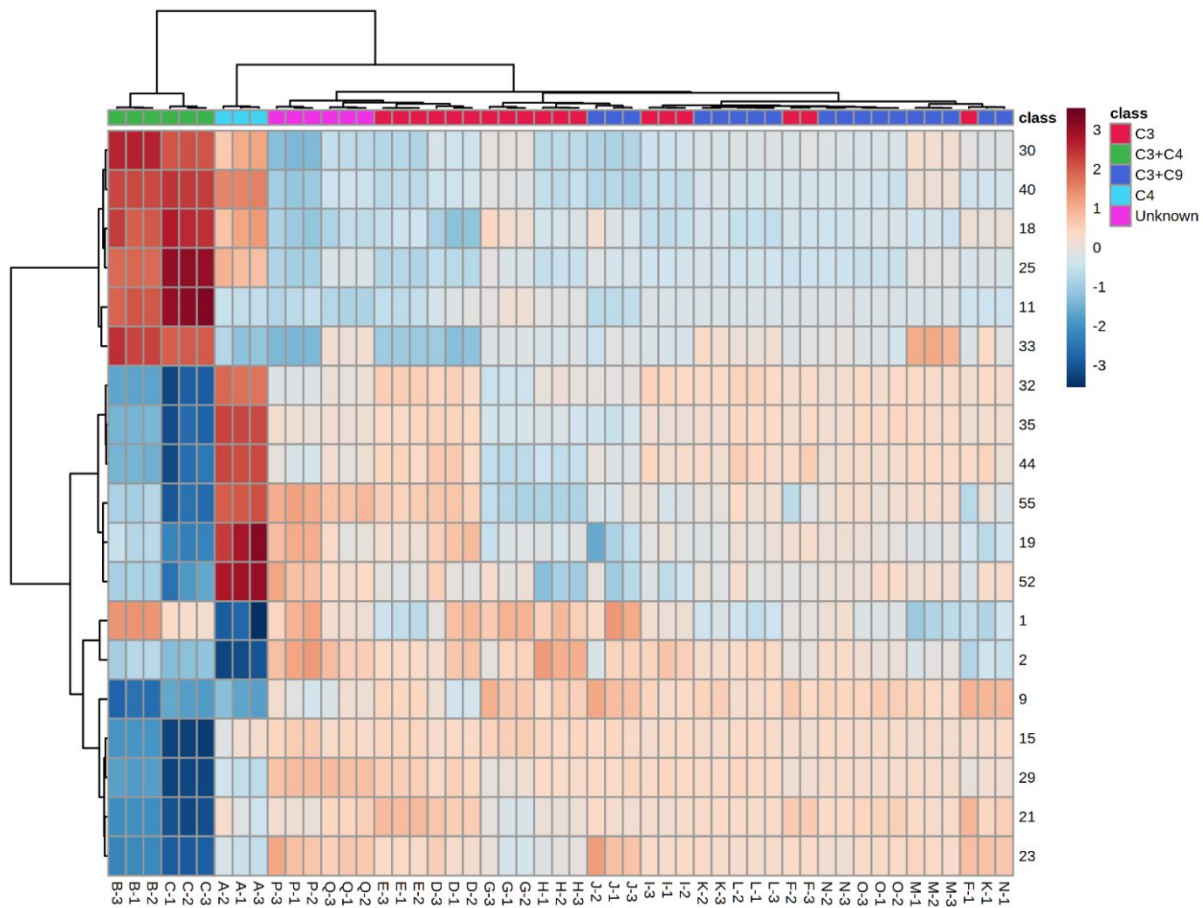

Figure S6. Heat map of the 17 dodecene products by using the data set of important features from dodecene isomers to differentiate feedstocks.



## S-7. Potential indicators of C<sub>4</sub> and C<sub>3</sub>+C<sub>4</sub> feedstocks

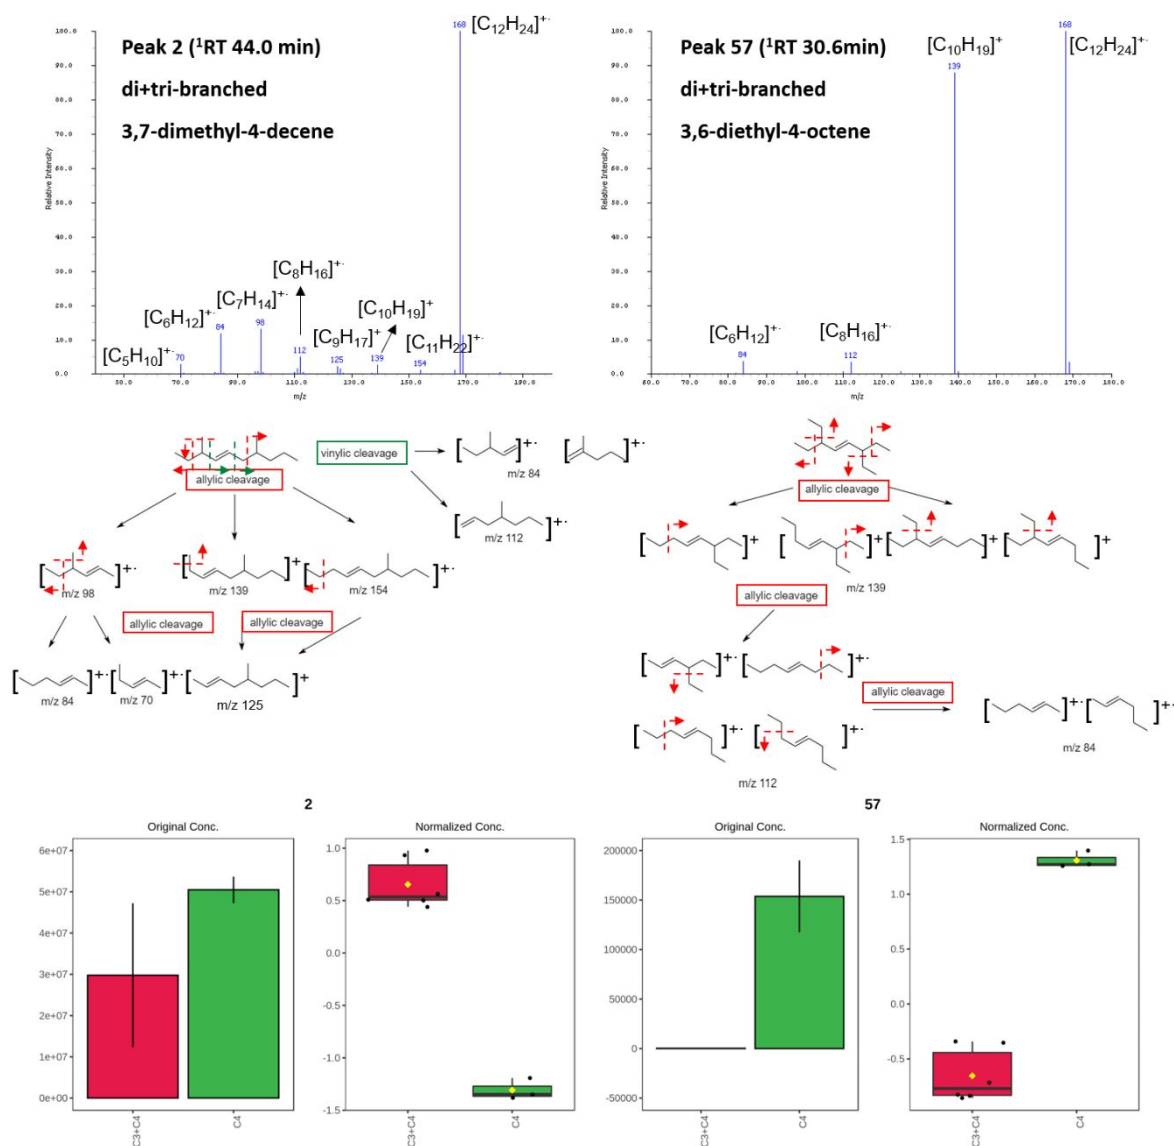

Figure S7. The potential indicators, 3,7-dimethyl-4-decene and 3,6-diethyl-4-octene, which can differentiate C<sub>4</sub> and C<sub>3</sub>+C<sub>4</sub> feedstocks, the PI mass spectra and the predicted molecular structures.

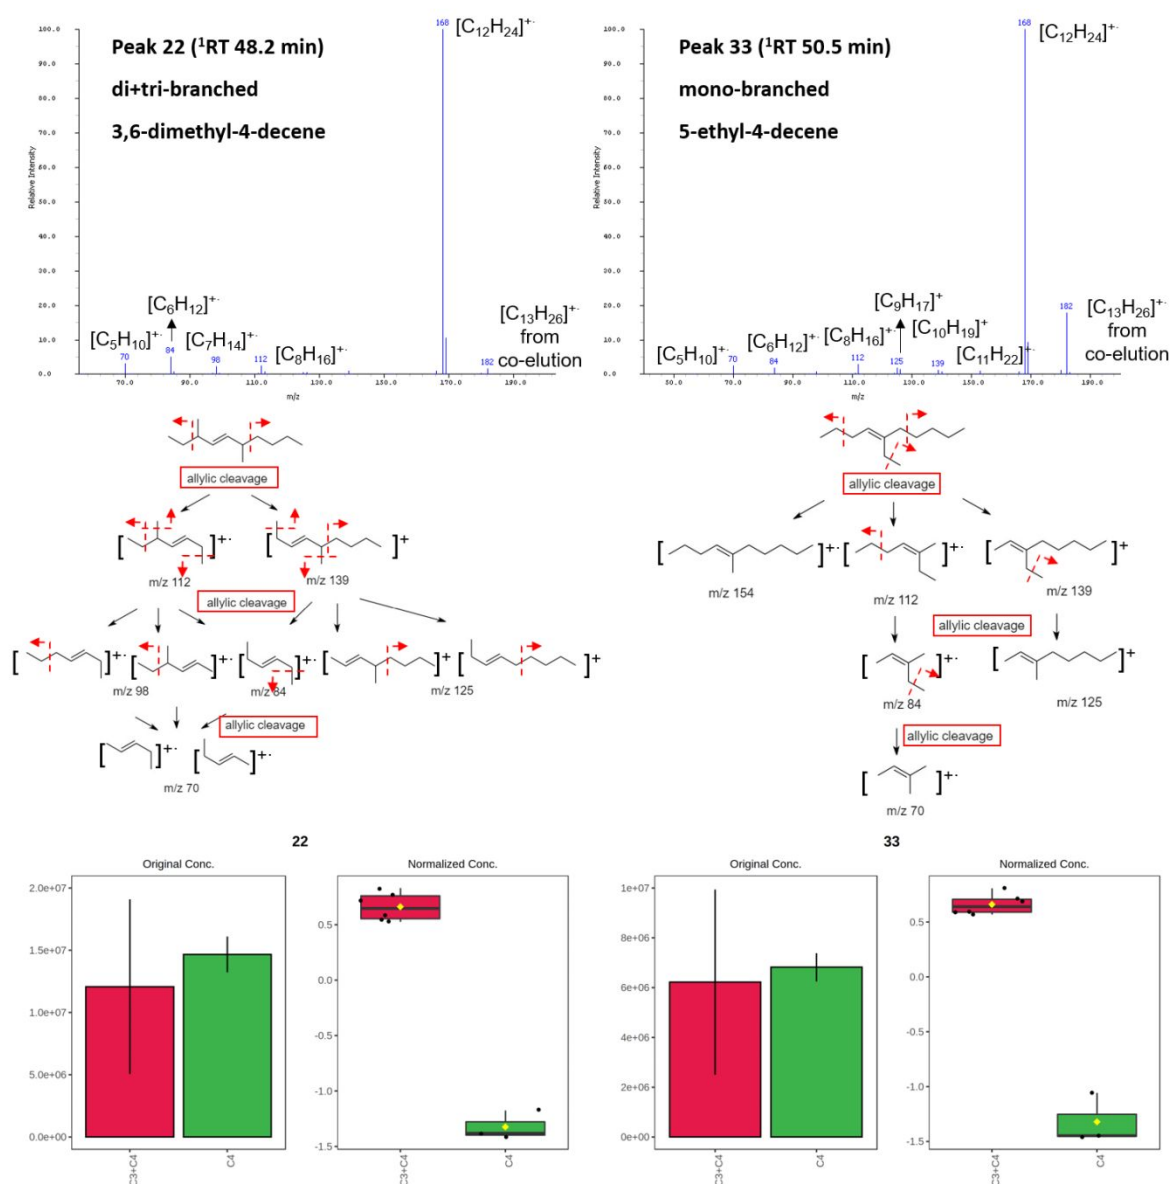

Figure S8. The potential indicators, 3,6-dimethyl-4-decene and 5-ethyl-4-decene, which can differentiate  $C_4$  and  $C_3+C_4$  feedstocks, the PI mass spectra and the predicted molecular structures.

The  $m/z$  182 in Peak 33 is assumed from the co-elution of tridecene. Co-elution could also introduce fragment ions of tridecene. As seen from the relative intensities of the fragment ions in the mass spectrum, each ion is less than 10% of the molecular ion  $m/z$  168. Assuming the intensity of fragment ions from tridecene is less than 10% of  $m/z$  182, and the intensity of  $m/z$  182 is less than 20% of  $m/z$  168. Therefore, the fragment ions from tridecene should not contribute more than 2% ( $10\% * 20\%$ ) of  $m/z$  168, which is neglectable in the mass spectrum. Therefore, the effect of fragment ions from tridecene is not taken into consideration for the structure prediction.

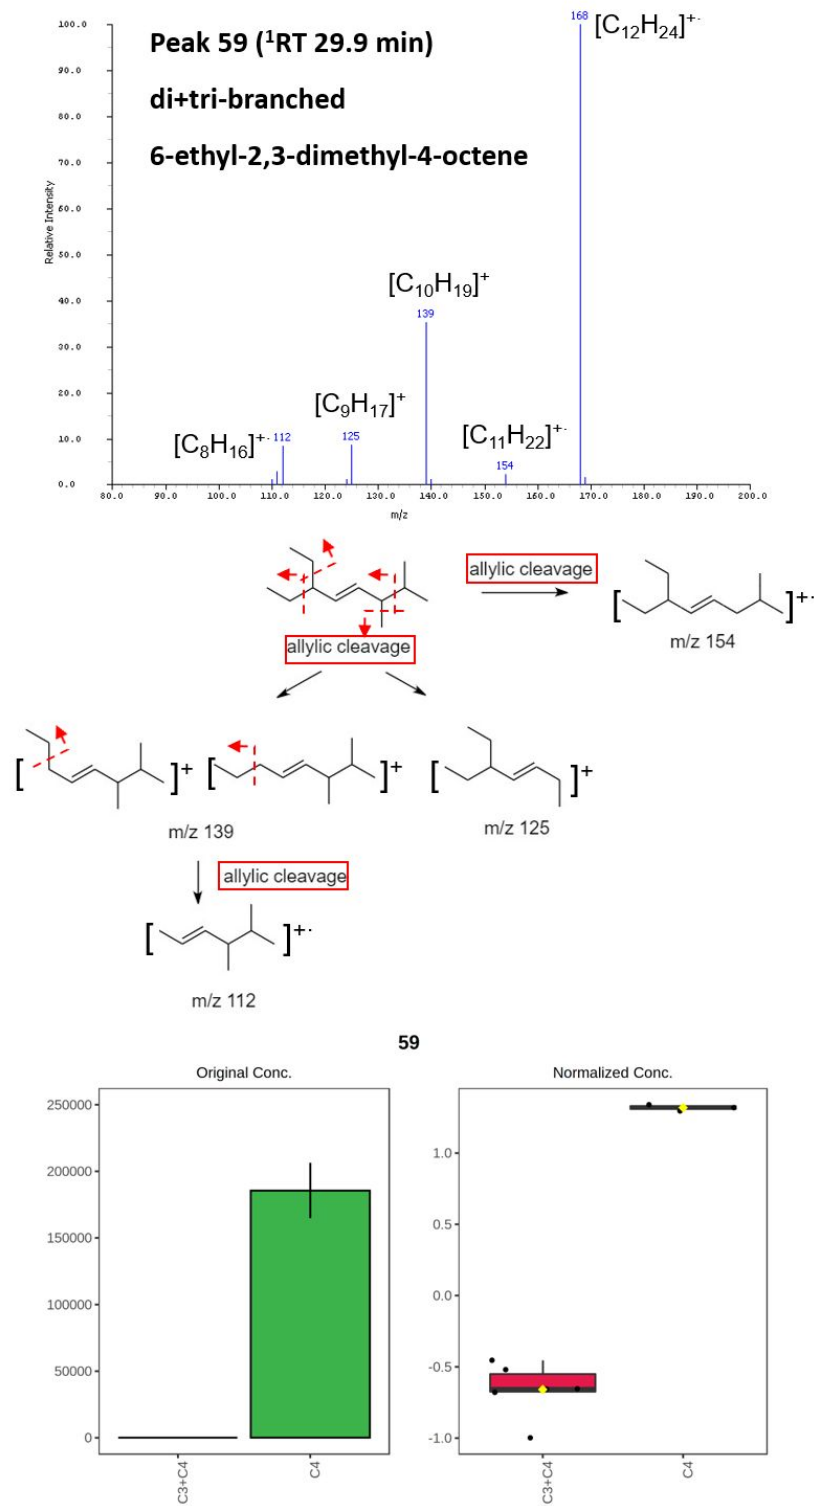

Figure S9. The potential indicator, 6-ethyl-2,3-dimethyl-4-octene, which can differentiate C<sub>4</sub> and C<sub>3</sub>+C<sub>4</sub> feedstocks, the PI mass spectra and the predicted molecular structures.

### S-8. The sample information

Table S3. The feedstocks and catalysts of the 17 dodecene products.

| Sample | Feedstock                      | Catalyst |
|--------|--------------------------------|----------|
| A      | C <sub>4</sub>                 | Zeolite  |
| B      | C <sub>3</sub> +C <sub>4</sub> | Zeolite  |
| C      | C <sub>3</sub> +C <sub>4</sub> | Zeolite  |
| D      | C <sub>3</sub>                 | SPA      |
| E      | C <sub>3</sub>                 | SPA      |
| F      | C <sub>3</sub>                 | SPA      |
| G      | C <sub>3</sub>                 | SPA      |
| H      | C <sub>3</sub>                 | SPA      |
| I      | C <sub>3</sub>                 | SPA      |
| J      | C <sub>3</sub> +C <sub>9</sub> | SPA      |
| K      | C <sub>3</sub> +C <sub>9</sub> | SPA      |
| L      | C <sub>3</sub> +C <sub>9</sub> | SPA      |
| M      | C <sub>3</sub> +C <sub>9</sub> | SPA      |
| N      | C <sub>3</sub> +C <sub>9</sub> | SPA      |
| O      | C <sub>3</sub> +C <sub>9</sub> | SPA      |
| P      | Unknown                        | SPA      |
| Q      | Unknown                        | SPA      |

## S-9. Details of analytical condition

Table S4. The analytical condition of GC×GC-PI-TOFMS.

|                       |                                                                                                                                                      |
|-----------------------|------------------------------------------------------------------------------------------------------------------------------------------------------|
| GC condition          |                                                                                                                                                      |
| Injector temperature  | 280 °C                                                                                                                                               |
| Injector mode         | Splitless                                                                                                                                            |
| Injection volume      | 1 µL                                                                                                                                                 |
| Oven temperature ramp | 35 °C (1 °C/min) 140 °C (1 min)                                                                                                                      |
| Flow control mode     | Constant flow                                                                                                                                        |
| Carrier gas flow rate | 0.8 mL/min                                                                                                                                           |
| Column set            | <sup>1</sup> D : Rxi-5MS (30 m, 0.25 mm i.d., 0.25 µm d <sub>f</sub> )<br><sup>2</sup> D : Rxi-17Sil MS (2 m, 0.25 mm i.d., 0.25 µm d <sub>f</sub> ) |
| MS condition          |                                                                                                                                                      |
| Interface temperature | 300 °C                                                                                                                                               |
| PI temperature        | 200 °C                                                                                                                                               |
| Reservoir temperature | 45 °C                                                                                                                                                |
| Detector voltage      | 2700 V                                                                                                                                               |
| Ionizing voltage      | 0 V                                                                                                                                                  |
| Mass range            | <i>m/z</i> 29 - 450                                                                                                                                  |
| Acquisition time      | 6.1 – 106 min                                                                                                                                        |
| Solvent delay         | 6 min                                                                                                                                                |
| Sampling interval     | 0.25 ns                                                                                                                                              |
| Recording interval    | 0.02 s                                                                                                                                               |
| Accumulation time     | 0.017 s                                                                                                                                              |
| Wait time             | 0.003 s                                                                                                                                              |
| Modulator condition   |                                                                                                                                                      |
| Modulation period     | 4 s                                                                                                                                                  |
| Desorb time           | 1 s                                                                                                                                                  |
| Delay time            | 0 s                                                                                                                                                  |
| Temp offset mode      | Follow GC oven temperature                                                                                                                           |
| Temp offset (entry)   | 30 °C                                                                                                                                                |
| Temp offset (exit)    | 120 °C                                                                                                                                               |
| Trap temperature      | -51 °C                                                                                                                                               |
| Modulation column     | HV series (0.7 m, 0.25 mm i.d., 0.36 mm o.d.)                                                                                                        |

The final oven temperature was set at 140 °C instead of a temperature close to the fraction distillation temperature of dodecene products. It is because that the fraction distillation is by heating up the sample to gas phase and separating the compounds by boiling points. But GC separation utilizes the partitioning between the vapors of compound and compound partitioned into the stationary phase of the column. The best separation happens when the

temperature offers the most transitions in and out of the stationary phase. Normally this temperature is tens of degrees Celsius below the boiling point.

## S-10. Chromatogram of dodecene product

### (a) Chromatogram of the dodecene product and identification of the olefin congeners according to carbon chain length and DBE

Reprinted with permission from reference (10) Zou, Y., Stefanuto, P.-H., Maimone, M., Janssen, M., Focant, J.-F. Unraveling the complex olefin isomer mixture using two-dimensional gas chromatography-photoionization-time of flight mass spectrometry, J. Chromatogr. A. 2021, 1645, 462103. Copyright [2021] [Elsevier B.V.].

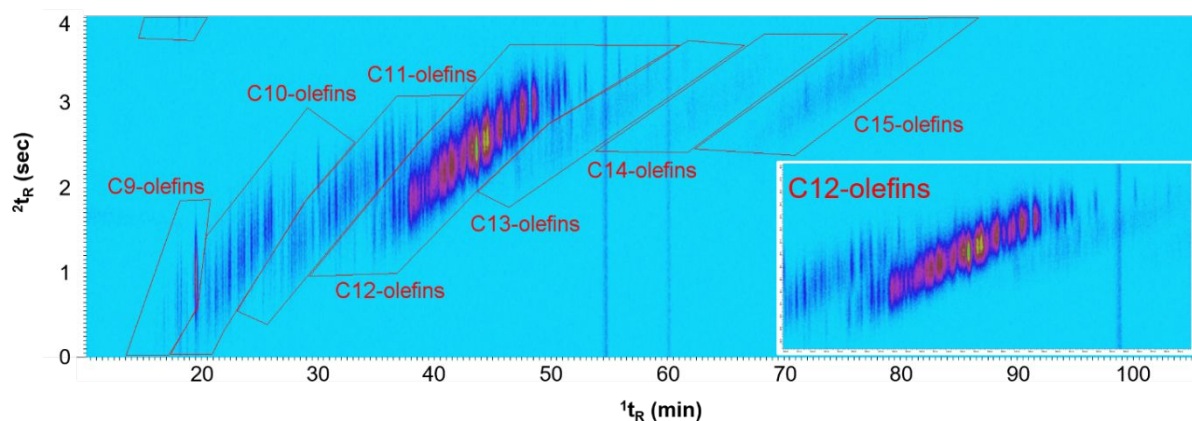

### (b) The enlarged chromatogram of dodecene region, the grouping of dodecene structural subgroups by RT and some examples identifying linear dodecene isomers

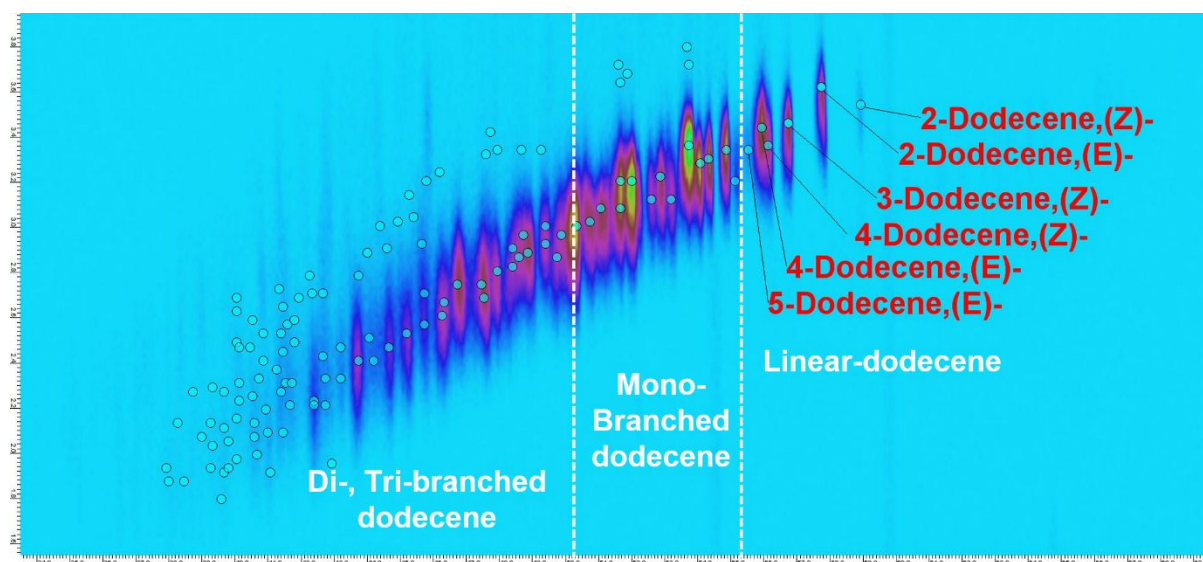

Figure S10. The chromatogram of dodecene product and the identification of olefin congeners, dodecene structural subgroups, and some dodecene isomers.
